# Supplementary material for: Duration of vegetation green-up response to snowmelt on the Tibetan Plateau
Source: Copernicus journal article supplement (doi:10.5194/bg-22-2637-2025), 2025-06-10
Supplement: Supplementary file 1 [file bg-22-2637-2025-supplement.pdf]

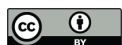

## *Supplement of*

# **Duration of vegetation green-up response to snowmelt on the Tibetan Plateau**

**Jingwen Ni et al.**

*Correspondence to:* Yan Huang (yhuang@geo.ecnu.edu.cn)

The copyright of individual parts of the supplement might differ from the article licence.

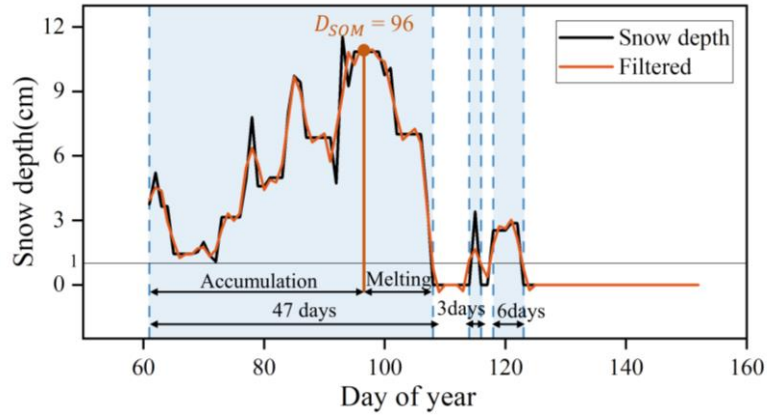

**Figure S1:** Diagram illustrating the identification of start of snowmelt ( $D_{SOM}$ ). The snow depth is smoothed using Sacitzky-Golay filtering, represented by the orange line. Each continuous snowfall event is identified based on set criteria and highlighted with a blue background. The duration of each snow event, indicated by the number of days, is used to determine the longest snowfall process. The final identified  $D_{SOM}$  is marked by the orange point.

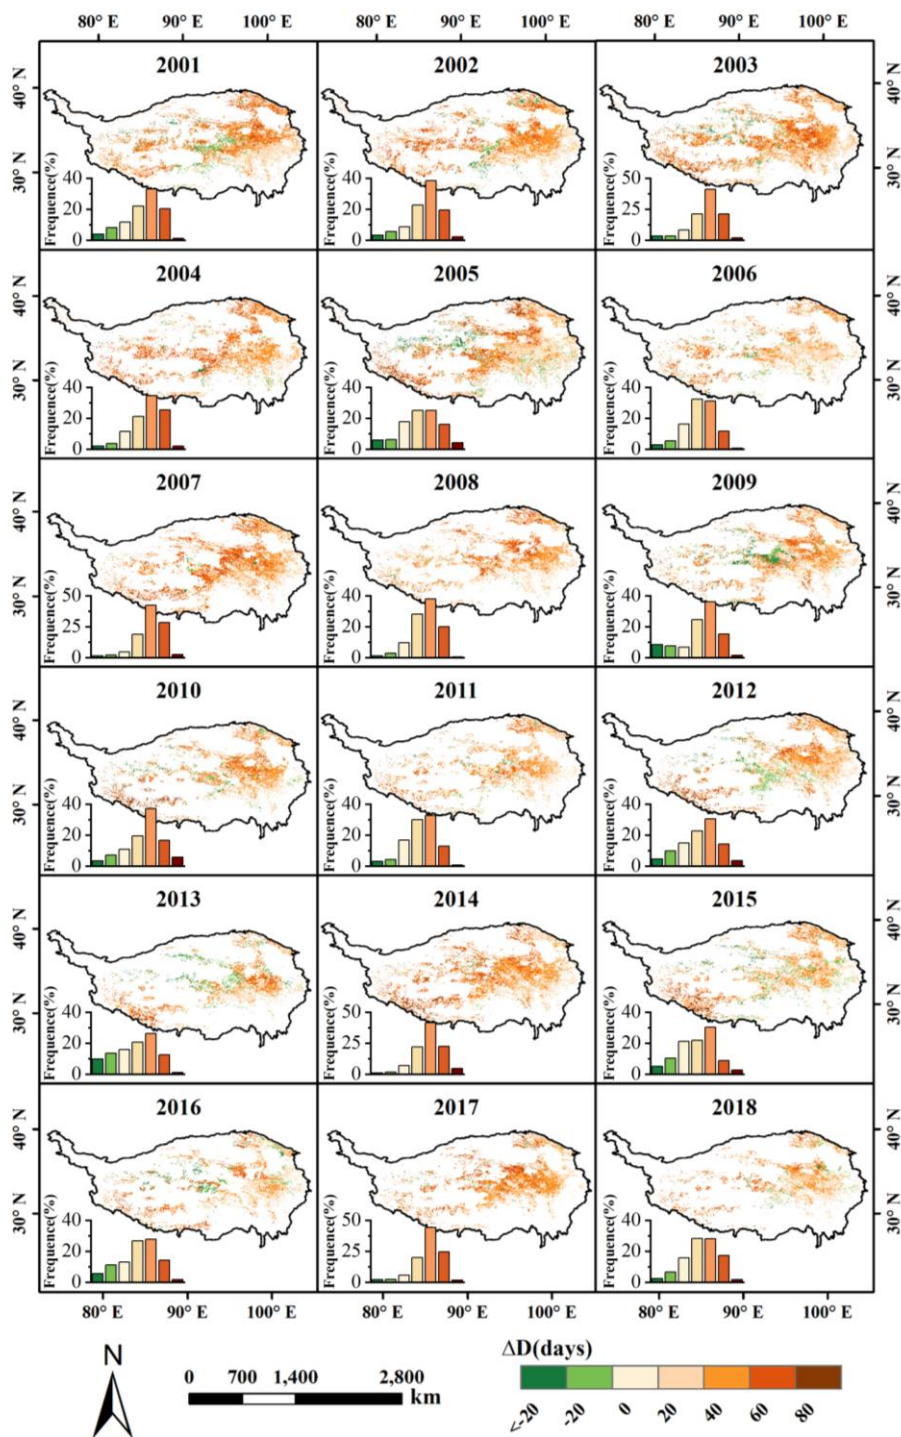

**Figure S2:** Spatial and frequency distribution histograms of  $\Delta D$  on the Tibetan Plateau from 2001-2018.

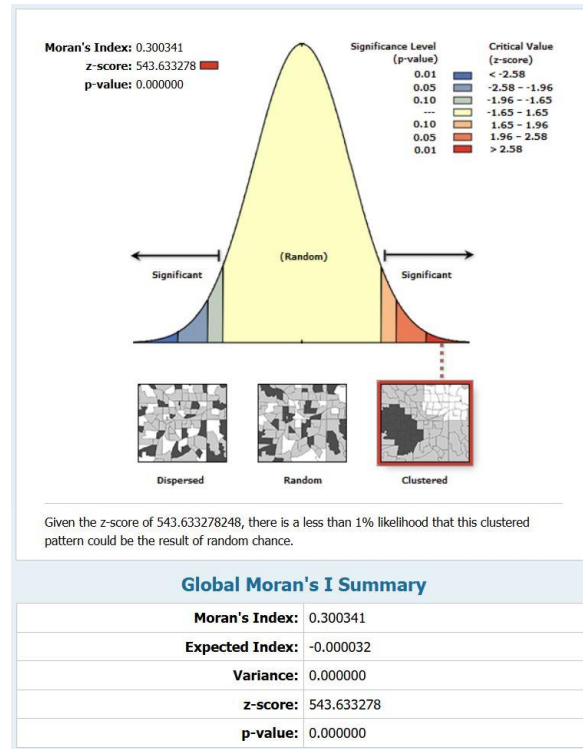

**Figure S3:** Report of the global Moran's I over 2001-2018 on the Tibetan Plateau

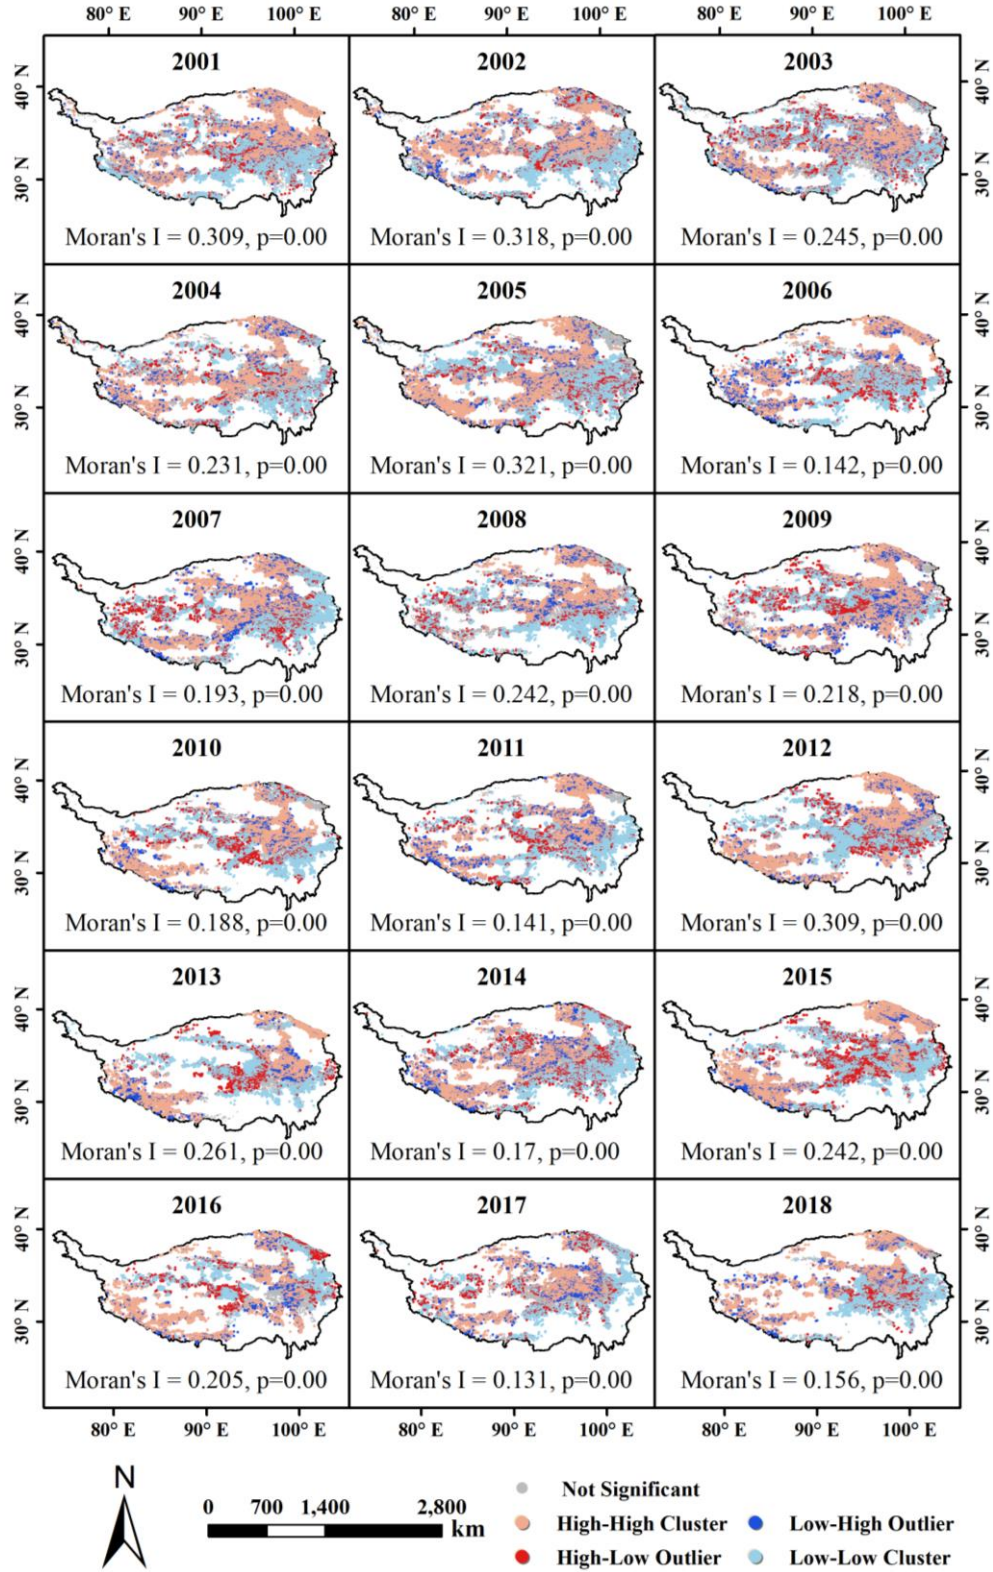

**Figure S4:** Global and local Moran's I values of  $\Delta D$  from 2001-2018 on the Tibetan Plateau

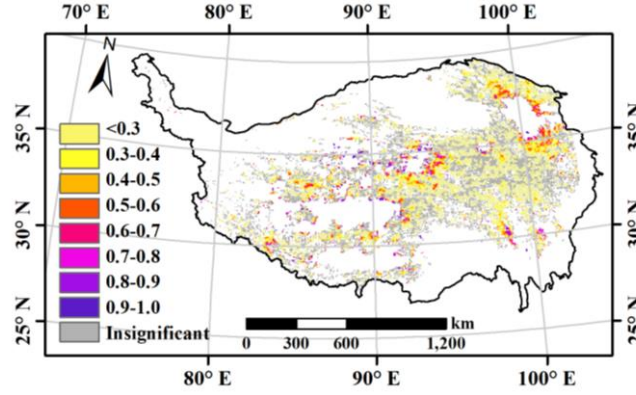

**Figure S5:** The fitting accuracy  $R^2$  of linear regression model of  $\Delta D$  for each pixel.

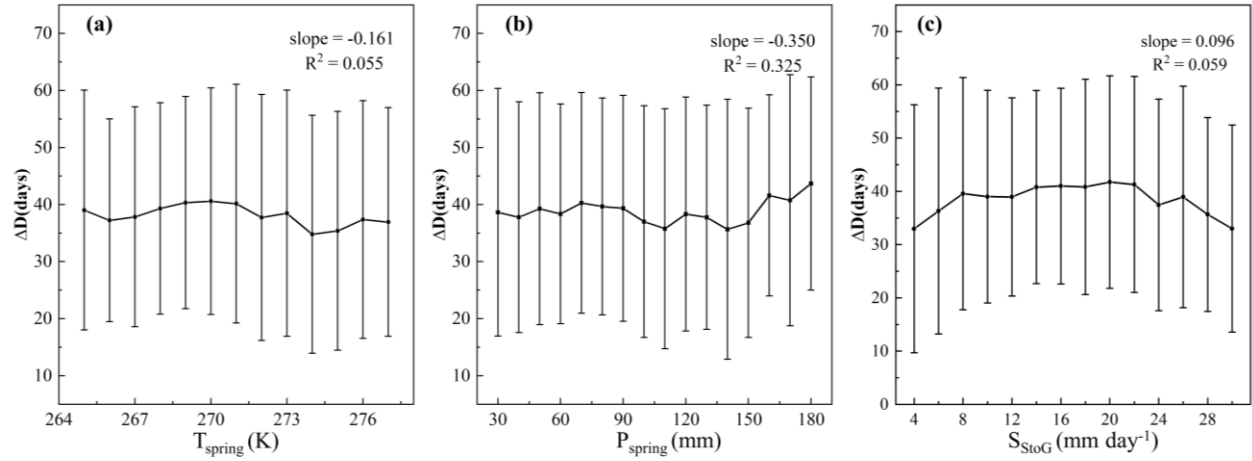

**Figure S6:** Variations in  $\Delta D$  calculated from SOMHMA across regions with differing (a) spring mean temperature ( $T_{\text{spring}}$ ), (b) spring total rainfall ( $P_{\text{spring}}$ ), and (c) daily snowmelt from  $D_{\text{SOM}}$  to  $D_{\text{GU}}$  ( $S_{\text{StoG}}$ ). Points represent the mean  $\Delta D$ , while error bars denote one standard deviation. The slope and  $R^2$  value reflect the coefficient and precision of the linear regression, respectively, with a significance level of 0.01.



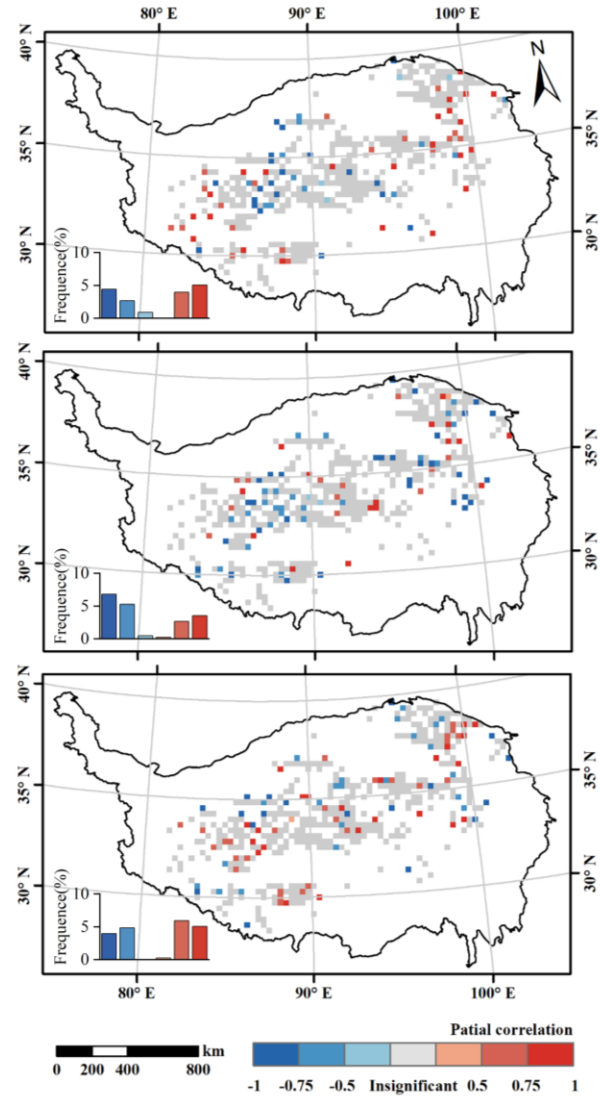

**Figure S7:** Spatial distribution of the partial correlation between  $\Delta D$  calculated from SOMHMA and (a) spring mean temperature ( $R_{\Delta D \& T_{spring}}$ ), (b) spring total rainfall ( $R_{\Delta D \& P_{spring}}$ ), and (c) daily snowmelt from  $D_{SOM}$  to  $D_{GU}$  ( $R_{\Delta D \& S_{toG}}$ ) with a significance level of 0.05.

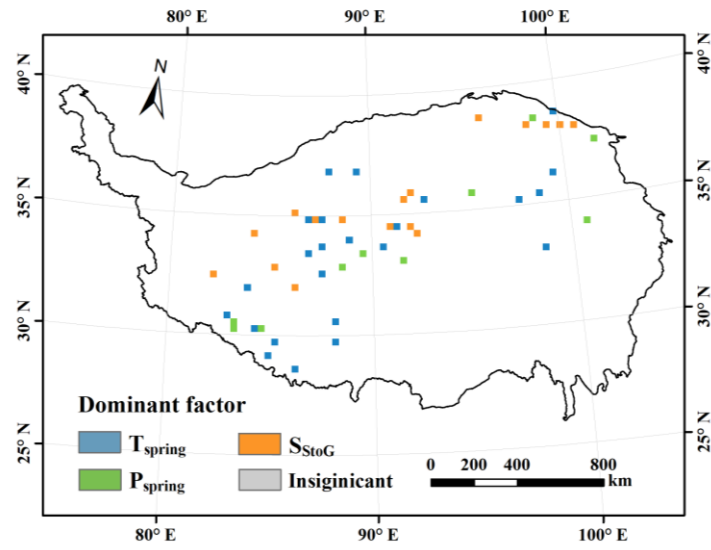

**Figure S8:** Spatial distribution of dominant factor of  $\Delta D$  with a significance level of 0.05 calculated from SOMHMA
